# Supplementary material for: Adult-Onset Autoimmune Diabetes in Europe Is Prevalent With a Broad Clinical Phenotype
Source: Oxford University Press journal article supplement (doi:10.2337/dc12-0931), 2012-12-18

SUPPLEMENTARY DATA

**Supplementary Table 1.** Features of GADA or any autoantibody positive versus autoantibody negative patients (%) in hospital and community based setting.

|                                                | <b>GADA Positive</b> | <b>Any Autoantibody Positive</b> | <b>Autoantibody Negative</b> | <b>P value</b> |
|------------------------------------------------|----------------------|----------------------------------|------------------------------|----------------|
|                                                | <b>541</b>           | <b>598</b>                       | <b>5508</b>                  |                |
| <b>Hospital Based Cases</b>                    | 319                  | 347                              | 2873                         |                |
| <b>Community Based Cases</b>                   | 222                  | 251                              | 2635                         |                |
| <b>Subjects on insulin (%) Hospital Based</b>  | 145 (45.5%)          | 153 (44.1%)                      | 361/2873 (12.6%)             | <0.0001        |
| <b>Subjects on insulin (%) Community Based</b> | 114 (51.4%)          | 126 (50.2%)                      | 367/2635 (13.9%)             | <0.0001        |

**Supplementary Table 2.** Features of patients positive for autoantibodies other than GADA versus autoantibody negative patients. %, Mean (SD).

|                                 | <b>ZnT8 and/or IA-2A Positive (GADA negative)</b> | <b>Autoantibody Negative</b> | <b>P value</b> |
|---------------------------------|---------------------------------------------------|------------------------------|----------------|
| <b>Cases</b>                    | <b>57</b>                                         | <b>5558</b>                  |                |
| <b>Females</b>                  | n=21 (36.8%)                                      | n=2260 (40.7%)               | >0.5           |
| <b>Males</b>                    | n=36 (63.2%)                                      | n=3298 (59.3%)               |                |
| <b>Mean age (years)</b>         | 50.4 (10.3)                                       | 54.9 (9.4)                   | <0.001         |
| <b>Age of onset (years)</b>     | 47.5 (12.4)                                       | 52.5 (10.6)                  | 0.005          |
| <b>Duration Disease (years)</b> | 1.9 (1.7)                                         | 2.3 (1.6)                    | 0.19           |
| <b>Subjects on insulin (%)</b>  | 20/57 (35%)                                       | 728/5508 (13.2%)             | <0.001         |
| <b>Time to Insulin (years)</b>  | Insufficient data                                 | 0.87 (1.4)                   | _____          |
| <b>BMI (kg/m<sup>2</sup>)</b>   | 28.5 (1.7)                                        | 30.9 (6.5)                   | <0.001         |
| <b>Waist-Hip ratio</b>          | 0.9 (0.1)                                         | 0.95 (0.09)                  | 0.002          |
| <b>Waist Circumference (cm)</b> | 96.1 (12.7)                                       | 103.8 (14.6)                 | 0.003          |
| <b>HDL Cholesterol (mmol/L)</b> | 1.4 (0.3)                                         | 1.3 (0.4)                    | 0.66           |
| <b>LDL Cholesterol (mmol/L)</b> | 3.1 (0.6)                                         | 1.6 (0.8)                    | >0.5           |
| <b>Systolic BP (mmHg)</b>       | 122 (23)                                          | 122 (31)                     | >0.5           |
| <b>TGL (mmol/L)</b>             | 1.6 (0.4)                                         | 2.0 (1.5)                    | >0.5           |

SUPPLEMENTARY DATA

**Supplementary Table 3.** Features of GADA low versus autoantibody negative patients. %, Mean (SD). (\* Information for gender missing on 1 subject).

|                                 | <b>GADA Low</b> | <b>Autoantibody Negative</b> | <b>P value</b> |
|---------------------------------|-----------------|------------------------------|----------------|
| <b>Cases</b>                    | <b>138</b>      | <b>5558</b>                  |                |
| <b>Females*</b>                 | 59 (42.8%)      | n=2260 (40.7%)               | >0.5           |
| <b>Males</b>                    | 78 (56.5%)      | n=3298 (59.3%)               |                |
| <b>Mean age (years)</b>         | 50.2 (10.9)     | 54.9 (9.4)                   | <0.001         |
| <b>Age of onset (years)</b>     | 47.6 (10.8)     | 52.5 (10.6)                  | <0.001         |
| <b>Duration Disease (years)</b> | 2.46 (1.7)      | 2.3 (1.6)                    | 0.076          |
| <b>Subjects on insulin (%)</b>  | 52/131 (39.7%)  | 728/5508 (13.2%)             | < 0.001        |
| <b>Time to Insulin (years)</b>  | 0.86 (1.4)      | 0.87 (1.4)                   | >0.5           |
| <b>BMI (kg/m<sup>2</sup>)</b>   | 28.5 (6.6)      | 30.9 (6.5)                   | < 0.001        |
| <b>Waist-Hip ratio</b>          | 0.89 (0.1)      | 0.95 (0.09)                  | <0.001         |
| <b>Waist Circumference (cm)</b> | 96.7 (16.6)     | 103.8 (14.6)                 | < 0.001        |
| <b>HDL Cholesterol (mmol/L)</b> | 1.4 (0.5)       | 1.3 (0.4)                    | >0.5           |
| <b>LDL Cholesterol (mmol/L)</b> | 2.2 (1.1)       | 1.6 (0.8)                    | < 0.001        |
| <b>Systolic BP (mmHg)</b>       | 116 (31)        | 122 (31)                     | < 0.001        |
| <b>TGL (mmol/L)</b>             | 1.8 (1.7)       | 2.0 (1.5)                    | < 0.001        |

SUPPLEMENTARY DATA

**Supplementary Figure 1.** GADA QQ plot for all cases, the first vertical line (black) indicates the Laboratory based cut off for positivity for GADA which was at 70 units based on the end point dilution of the standard curve and validated by the intersection in the QQ plot. The second vertical line (red) indicates another inflection point (not evident in the figure) equivalent to 200 units the cut off for high titre GADA.

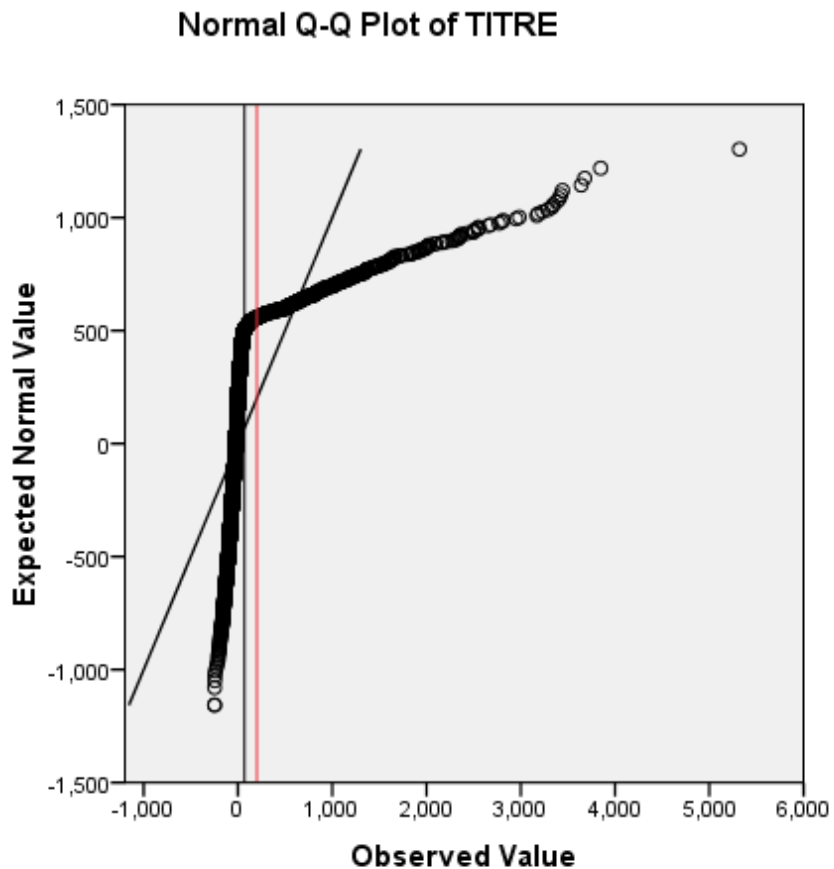

Supplement: dc120931supplementarydata.pdf [file dc120931supplementarydata.pdf]
